# Supplementary material
Source: PubMed Central journal article supplement (PMC5324086)
Supplement: oc6b00322_si_001.pdf [file oc6b00322_si_001.pdf]

# Quantifying hormone disruptors with an engineered bacterial biosensor

Ariel L. Furst,<sup>1</sup> Alexander C. Hoepker,<sup>1</sup> Matthew B. Francis<sup>1,2\*</sup>

<sup>1</sup>Department of Chemistry, University of California, Berkeley, Berkeley, CA, USA.

<sup>2</sup>Materials Sciences Division, Lawrence Berkeley National Laboratory, Berkeley, CA, USA.

\*Correspondence to: Matthew B. Francis [mbfrancis@berkeley.edu](mailto:mbfrancis@berkeley.edu)

## *Supplemental Information*

|      |                                         |    |
|------|-----------------------------------------|----|
| 1.1. | Supporting Figure 1                     | S2 |
| 1.2. | Supporting Figure 2                     | S3 |
| 1.3. | Supporting Figure 3                     | S4 |
| 1.4. | Supporting Figure 4                     | S5 |
| 1.5. | Supporting Figure 5                     | S6 |
| 1.6. | Supporting Table 1                      | S7 |
| 2.1. | Monobody encoding pSKB3 vector          | S8 |
| 2.2. | MBP-ER $\alpha$ encoding pSKB3 vector   | S8 |
| 2.3. | INPNC-ER $\alpha$ encoding pSKB3 vector | S9 |

## 1. SUPPORTING FIGURES

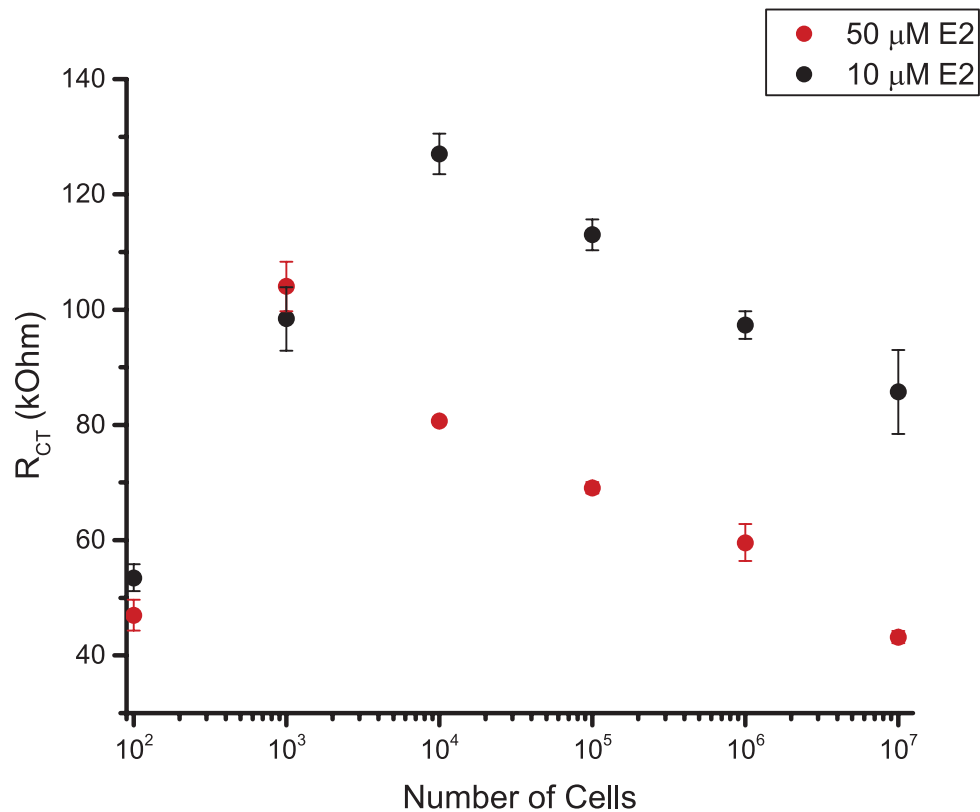

**Figure S1.** Optimization of number of cells applied to electrodes. The number of lyophilized cells on the electrodes was optimized at saturating estradiol (E2) levels: 50  $\mu$ M E2 (red) and 10  $\mu$ M E2 (black).  $R_{CT}$  values for varying numbers of cells at each concentration are shown. Error bars represent the SD for n=3 replicates.

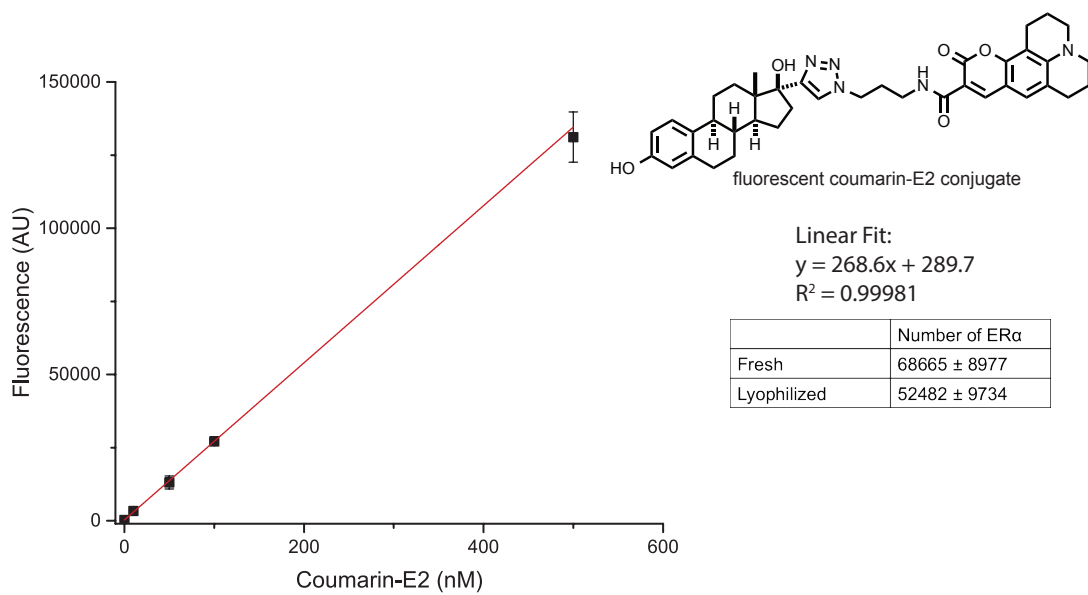

**Figure S2.** Standard curve of E2-coumarin fluorescence in the linear concentration range. The linear fit for the fluorescence at the peak wavelength (497 nm) was used to determine the number of surface-expressed ER $\alpha$  proteins.

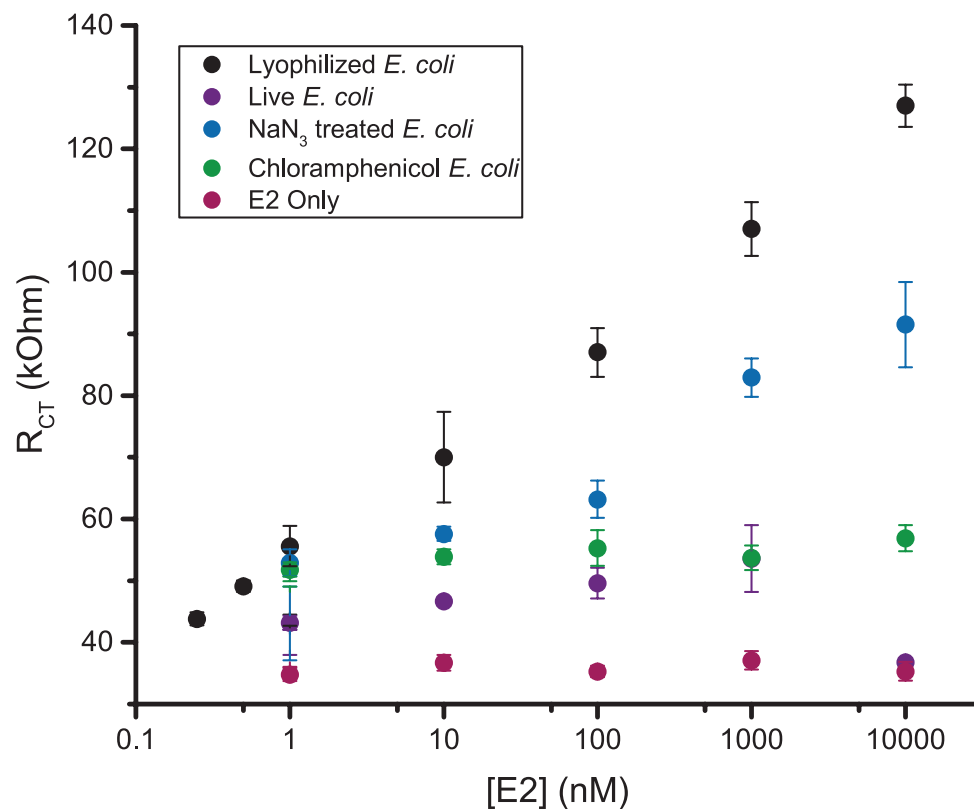

**Figure S3.** Estradiol concentration dependent  $R_{CT}$  for ER $\alpha$  on lyophilized *E. coli* (black), ER $\alpha$  on live *E. coli* (purple), ER $\alpha$  on NaN<sub>3</sub> killed *E. coli* (blue), and ER $\alpha$  on chloramphenicol-treated non-viable live *E. coli* (green). Monobody surfaces treated with only E2 are also shown (pink). Error bars represent the SD for n=3 replicates.

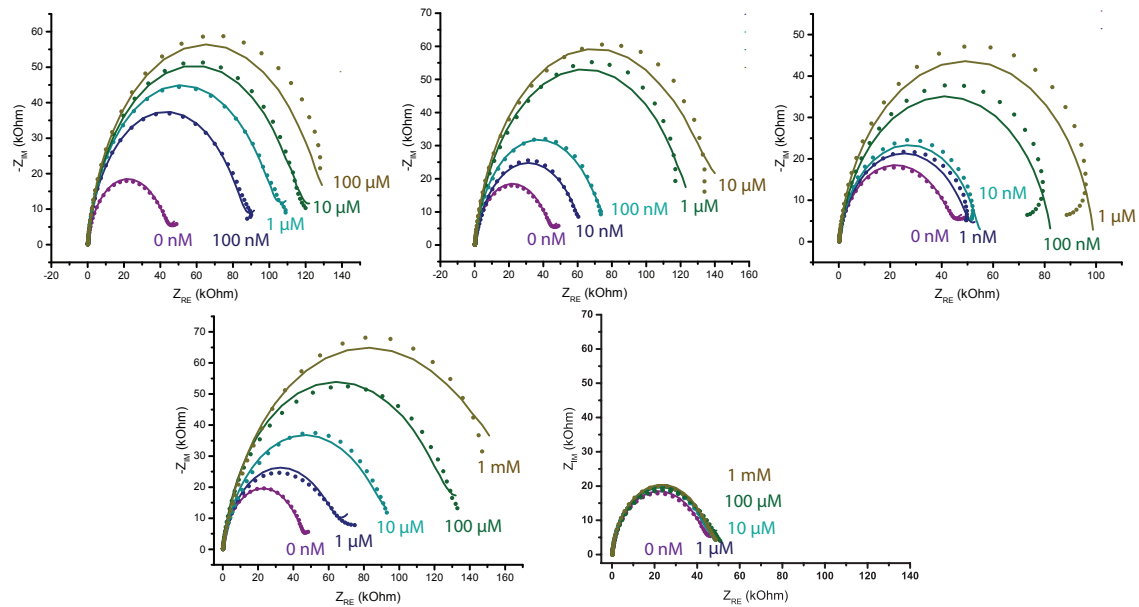

**Figure S4.** Nyquist plots with CPE fits for the endocrine disrupting compounds 4-nonylphenol (top left), genistein (top center), diethylstilbestrol (top right), bisphenol A (bottom left), and the non-binding hormone progesterone (bottom right).

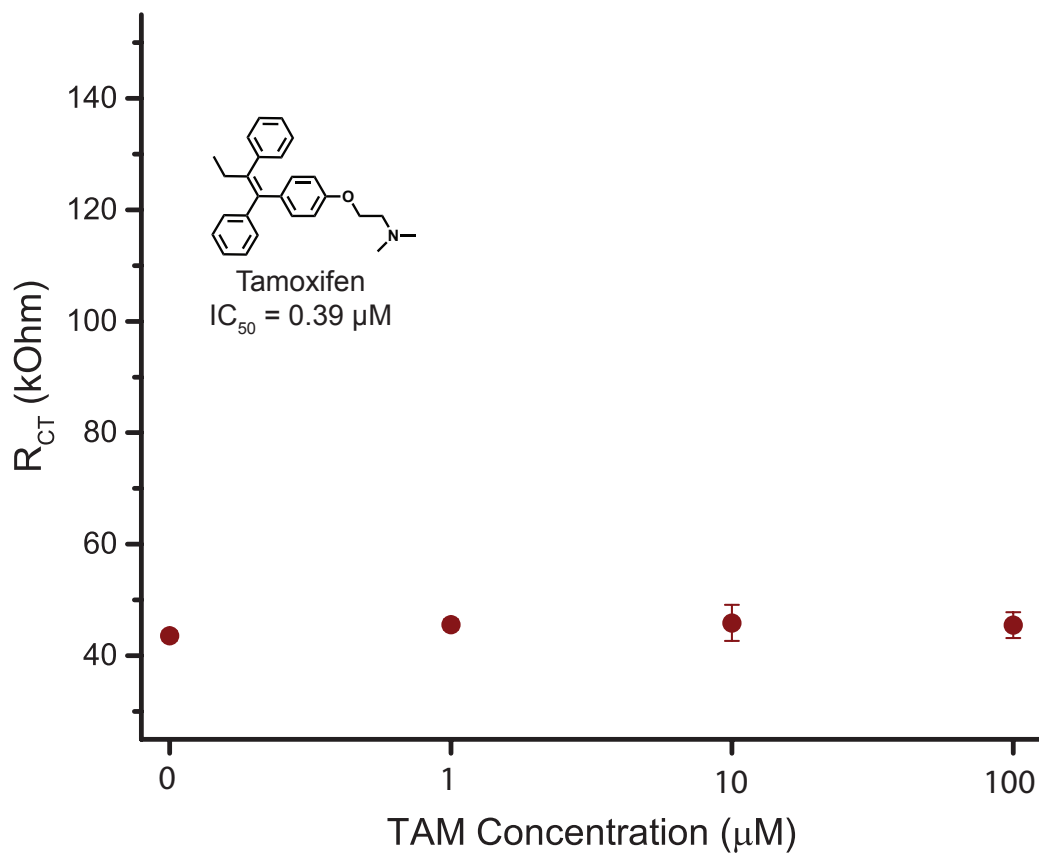

**Figure S5.** Chemotherapeutic and ER $\alpha$  antagonist Tamoxifen concentration dependent  $R_{CT}$  for ER $\alpha$  on lyophilized *E. coli*; no  $R_{CT}$  response is observed independent of concentration, indicating that the antagonist-ER $\alpha$  complex does not bind to the monobody. Error bars represent the SD for n=3 replicates.

**Table S1.** Concentrations of analytes used in Figure 4c of the main text.<sup>a</sup>

| Sample  | Compound | %    | 0 Kd | 1 Kd     | 10 Kd    | 100 Kd   | 1000 Kd  |
|---------|----------|------|------|----------|----------|----------|----------|
| Control | E2       | 100  | 0    | 1.00E+00 | 1.00E+01 | 1.00E+02 | 1.00E+03 |
| 1       | BPA      | 50   | 0    | 5.00E+03 | 5.00E+04 | 5.00E+05 | 5.00E+06 |
|         | 4-NP     | 16.6 | 0    | 3.30E+02 | 3.30E+03 | 3.30E+04 | 3.30E+05 |
|         | DES      | 16.6 | 0    | 3.30E-02 | 3.30E-01 | 3.32E+00 | 3.32E+01 |
|         | GEN      | 16.6 | 0    | 8.00E+01 | 8.00E+02 | 8.00E+03 | 8.00E+04 |
| 2       | BPA      | 16.6 | 0    | 1.66E+03 | 1.66E+04 | 1.66E+05 | 1.66E+06 |
|         | 4-NP     | 50   | 0    | 1.00E+03 | 1.00E+04 | 1.00E+05 | 1.00E+06 |
|         | DES      | 16.6 | 0    | 3.30E-02 | 3.30E-01 | 3.32E+00 | 3.32E+01 |
|         | GEN      | 16.6 | 0    | 8.00E+01 | 8.00E+02 | 8.00E+03 | 8.00E+04 |
| 3       | BPA      | 16.6 | 0    | 1.66E+03 | 1.66E+04 | 1.66E+05 | 1.66E+06 |
|         | 4-NP     | 16.6 | 0    | 3.30E+02 | 3.30E+03 | 3.30E+04 | 3.30E+05 |
|         | DES      | 50   | 0    | 1.20E-01 | 1.20E+00 | 1.20E+01 | 1.20E+02 |
|         | GEN      | 16.6 | 0    | 8.00E+01 | 8.00E+02 | 8.00E+03 | 8.00E+04 |

<sup>a</sup>All concentrations in nM.

## 2. PLASMID SEQUENCES

### 2.1. *Monobody encoding pSKB3 vector.*

CCATGGGCTGCAGCCATCATCATCATCACGATTACGATATCCCAACGACCGAAAACCTTTA  
CTTCCAGGGATCCGTCTCTGACGTACCTCGGACTTAGAGGTGGTCGCGCCACGCCACGAGC  
CTGTTGATTAGCTGGGATGCTCCGGCAGTTACCGTGCCTATTATCGCATCACATATGGTGAGA  
CGGGCGGCAACTCCCCAGTACAGGAATTCACCGTGCCGGGTAGTAAATCAACAGCCACCATTTC  
AGGTTTGAAGCCGGGAGTGGATTATACTATCACCGTTTATGCAGTTACGGGCCTTCGCCTGATG  
CTGGCTGGCAGCAAACCGATCTCAATCAACTATCGCACGTAAGCGGCCGCACTCGAG

Underlined restriction sites in order of sequence: NcoI/BamHI/NotI/XhoI

Green: 6His affinity tag encoding sequence

Orange: TEV encoding sequence

Purple: Monobody encoding sequence

### 2.2. *MBP-ERa encoding pSKB3 vector.*

CCATGGCCAGCAGCCATCATCATCATCACGATTACGATATCCCAACGACCGAAAACCTTTA  
CTTCCAGGGATCCGAAAACCTTTACTTCCAGGGATCCAAAATCGAAGAAGGTAAACTGGTAATC  
TGGATTAACGGCGATAAAGGCTATAACGGTCTCGCTGAAGTCGGTAAGAAATTCGAGAAAGATA  
CCGGAATTAAGTCACCGTTGAGCATCCGGATAAACTGGAAGAGAAAATCCCACAGGTTGCGGC  
AACTGGCGATGGCCCTGACATTATCTTCTGGGCACACGACCGCTTTGGTGGCTACGCTCAATCT  
GGCCTGTTGGCTGAAATCACCCGGACAAAGCGTTCAGGACAAGCTGTATCCGTTTACCTGGG  
ATGCCGTACGTTACAACGGCAAGCTGATTGCTTACCCGATCGCTGTTGAAGCGTTATCGCTGAT  
TTATAACAAAGATCTGCTGCCGAACCCGCCAAAACCTGGGAAGAGATCCCGGCGCTGGATAAA  
GAACTGAAAGCGAAAGGTAAGAGCGCGCTGATGTTCAACCTGCAAGAACCGTACTTCACCTGGC  
CGCTGATTGCTGCTGACGGGGGTTATGCGTTCAAGTATGAAAACGGCAAGTACGACATTAAGA  
CGTGGGCGTGGATAACGCTGGCGCGAAAGCGGGTCTGACCTTCCTGGTTGACCTGATTAAAAAC  
AAACACATGAATGCAGACACCGATTACTCCATCGCAGAAGCTGCCTTTAATAAAGGCGAAACAG  
CGATGACCATCAACGGCCCCTGGGCATGGTCCAACATCGACACCAGCAAAGTGAATTATGGTGT  
AACGGTACTGCCGACCTTCAAGGGTCAACCATCCAAACCGTTCGTTGGCGTGCTGAGCGCAGGT  
ATTAACGCCCGCCAGTCCGAACAAAGAGCTGGCAAAGAGTTCCTCGAAAACCTATCTGCTGACTG  
ATGAAGGTCTGGAAGCGGTTAATAAAGACAAACCGCTGGGTGCCGTAGCGCTGAAGTCTTACGA  
GGAAGAGTTGGTGAAGATCCACGTGTTGCCGCCACTATGGAAAACGCCCAGAAAGGTGAAATC  
ATGCCGAACATCCCGCAGATGTCCGCTTCTGTTATGCCGTGCGTACTGCGGTGATCAACGCCG  
CCAGCGGTCGTCAGACTGTTCGATGAAGCCCTGAAAGACGCGCAGACTAATTCGAGCTCGAACAA  
CAACAACAATAACAATAACAACAACCTCGGGGCTAGCGGTTCTGGTTCGAAGAAAAACAGTTTA  
GCGTTAAGTCTGACTGCAGACCAAATGGTTTCCGCTTTACTGGATGCGGAACCTCCCATTCTGT  
ATAGTGAATATGATCCGACTCGTCCATTCAGCGAGGCCTCCATGATGGGCTTGTGACTAACTT  
AGCTGATCGCGAACTTGTACATATGATCAACTGGGCAAACCGCTACCTGGTTTTGTGACCTG  
ACCCTCCACGATCAGGTGCATCTGCTGGAATGTGCGTGGCTGGAAATCTTAATGATTGGGCTGG  
TCTGGCGTTCAATGGAACACCCAGGCAAGCTGTTGTTTGCACCAAATCTGCTGCTGGACCGCAA  
CCAGGGTAAGTGCCTGGAAGGTATGGTAGAAATTTTTGATATGCTCCTGGCCACCAGTTCTCGT  
TTTCGTATGATGAACCTTCAAGGGGAAGAATTTGTTTGTCTGAAGTCAATCATCTGCTGAACT  
CTGGAGTGTATACGTTCTTGAGTTCTACGCTGAAATCATTAGAAGAGAAAGATCACATTCATCG



TG TACTGGACAAAATCACAGATACGTTAATCCACCTTATGGCAAAGCAGGCTTGACTCTGCAG  
CAGCAACATCAACGCCTGGCGCAGTTGCTGTTGATTCTGAGTCACATCCGCCATATGAGCAATA  
AAGGCATGGAACATCTGTACTCCATGAAATGCAAAAATGTTGTCCCTTTATATGATCTGCTGTT  
AGAAATGCTGGATGCGCACCGTTTGACGCGCCGTAAGCGGCCGCACTCGAG

Underlined restriction sites in order of sequence: NcoI/BamHI/NheI/NotI/XhoI  
Green: 6His affinity tag encoding sequence  
Orange: TEV encoding sequence  
Blue: Maltose Binding Protein encoding sequence  
Purple: N<sub>10</sub> linker encoding sequence  
Red: ER $\alpha$  encoding sequence

### 2.3. INPNC-ER $\alpha$ encoding pSKB3 vector.

CCATGGCTCTCGACAAGGCGTTGGTGCTGCGTACCTGTGCAAATAACATGGCCGATCACTGCGG  
CCTTATATGGCCCGCGTCCGGCACGGTGGAAATCCAGATACTGGCAGTCAACCAGGCGGCATGAG  
AATGGTCTGGTTCGGTTTACTGTGGGGCGCTGGAACCAGCGCTTTTCTAAGCGTGCATGCCGATG  
CTCGATGGATTGTCTGTGAAGTTGCCGTTGCAGACATCATCAGTCTGGAAGAGCCGGGAATGGT  
CAAGTTTCCGCGGGCCGAGGTGGTTCATGTCCGGCAGCAGGATCAGCGCGTCACACTTCATTTCCG  
GCACGTCAGGCCGACCCTGCGTCAACGTCAACGTCAACGTCAACGTCAACGTTAACGCCAATGC  
CTACGGCATAACCCACGCCCATGCCTGCGGTAGCAAGTGTACGTTACCGGTGGCCGAACAGGCC  
CGTCATGAAGTGTTCGATGTCCGCTCGGTTCAGCGCGGCTGCCGCCCCAGTAAACACCCTGCCGG  
TGACGACGCCGAGAATTTGCAGACCAGATCCAGACTCTGGGACGGGAAGAGGTACAGGCAACT  
GGTCGCCAGAACGGGTGAGAACGGTGTGAGGCCGACATAACCGTATTACGTGAACGAAGATGAC  
GATATTGTGATAAACCAGCAGGACGATGACTGGATAGAGGTAAAGAGCTCGAACAACAACA  
ACAATAACAATAACAACAACCTCGGGGCTAGCGGTTCTGGTTCGAAGAAAAACAGTTTAGCGTT  
AAGTCTGACTGCAGACCAAATGGTTTCCGCTTTACTGGATGCGGAACCTCCCATTCTGTATAGT  
GAATATGATCCGACTCGTCCATTCAGCGAGGCCTCCATGATGGGCTTGTGACTAACTTAGCTG  
ATCGCGAACTTGTACATATGATCAACTGGGCAAACCGCTACCTGGTTTTGTTGACCTGACCCT  
CCACGATCAGGTGCATCTGCTGGAATGTGCGTGGCTGGAATCTTAATGATTGGGCTGGTCTGG  
CGTTCAATGGAACACCCAGGCAAGCTGTTGTTTGACCAAATCTGCTGCTGGACCGCAACCAGG  
GTAAGTGCCTGGAAGGTATGGTAGAAATTTTTGATATGCTCCTGGCCACCAGTTCTCGTTTTTCG  
TATGATGAACCTTCAAGGGGAAGAATTTGTTTGTCTGAAGTCAATCATCTGCTGAACTCTGGA  
GTGTATACGTTCTTGAGTTCTACGCTGAAATCATTAGAAGAGAAAGATCACATTCATCGTGTAC  
TGGACAAAATCACAGATACGTTAATCCACCTTATGGCAAAGCAGGCTTGACTCTGCAGCAGCA  
ACATCAACGCCTGGCGCAGTTGCTGTTGATTCTGAGTCACATCCGCCATATGAGCAATAAAGGC  
ATGGAACATCTGTACTCCATGAAATGCAAAAATGTTGTCCCTTTATATGATCTGCTGTTAGAAA  
TGCTGGATGCGCACCGTTTGACGCGCCGTAAGCGGCCGCACTCGAG

Underlined restriction sites in order of sequence: NcoI/NheI/NotI/XhoI  
Orange: INP<sub>N</sub> encoding sequence  
Blue: INP<sub>C</sub> encoding sequence  
Red: ER $\alpha$  encoding sequence
